# Supplementary material
Source: Springer Nature journal article supplement (https://www.springerprofessional.de/resource/supplementary/13638_2013_1028_MOESM4_ESM.pdf/11899114)

$$K = 100, P_{\text{loss}} = 10^{-6}, N = 10, n = 3$$

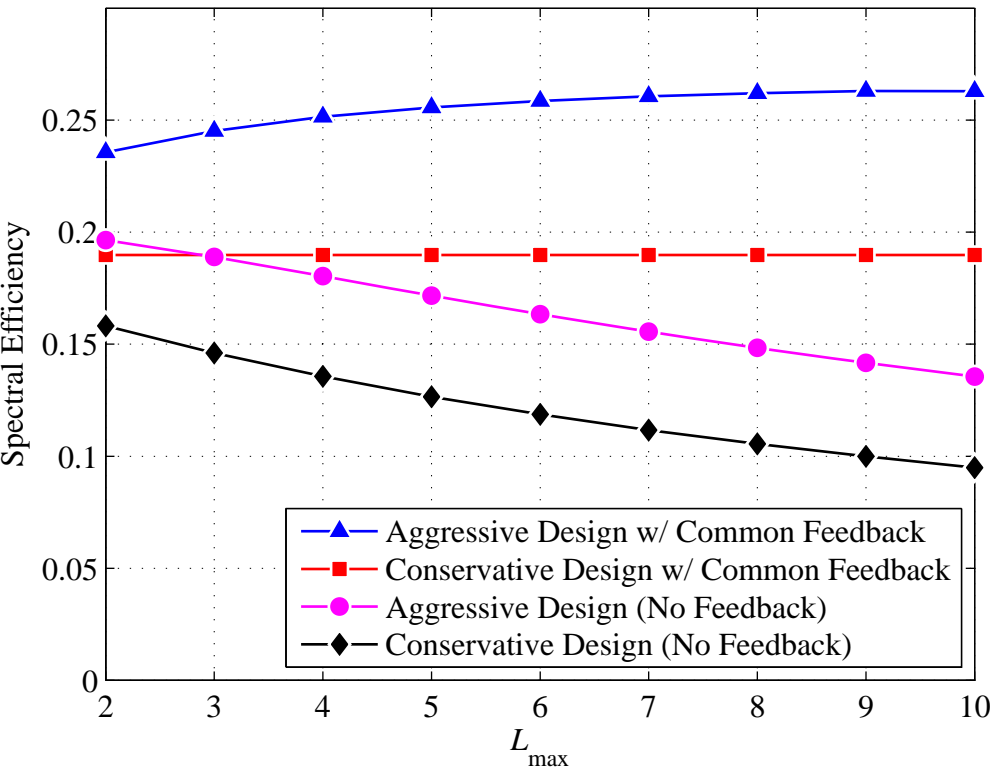

Supplement: MOESM4 [file 11899114]
